# Supplementary material for: Combining chemotherapeutic agents and netrin-1 interference potentiates cancer cell death
Source: PubMed Central journal article supplement (PMC3914534; doi:10.1002/emmm.201302654), 2013-10-08

Figure 1C

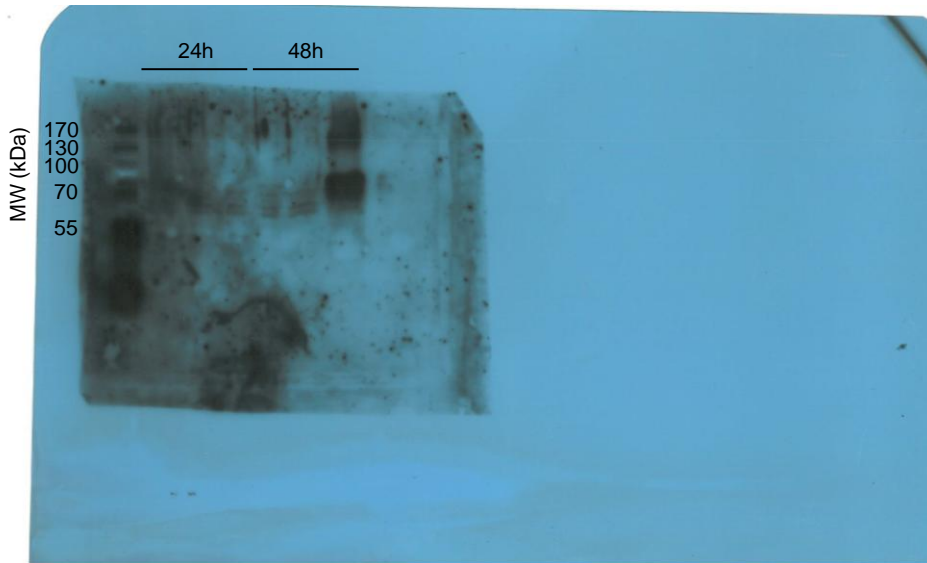

Supplementary Figure 3A/3D

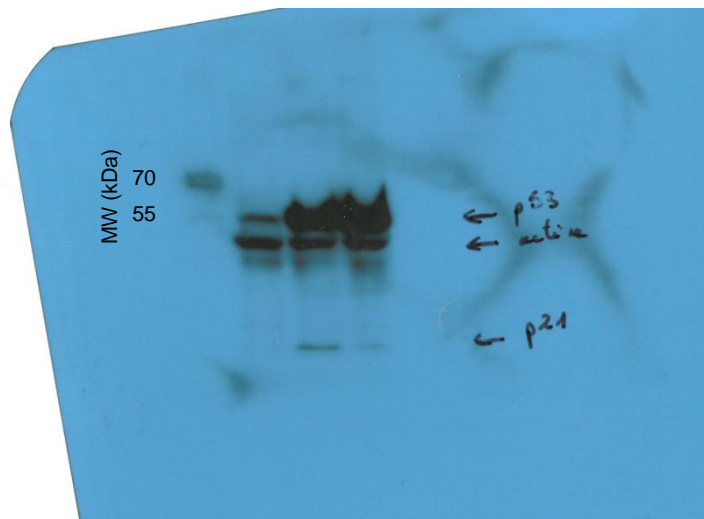

Supplementary Figure 2C

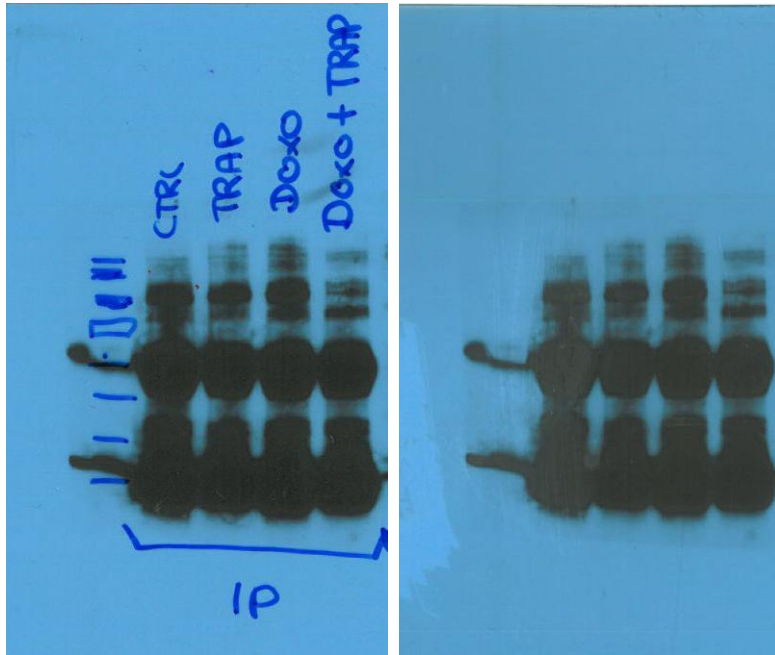

Supplementary Figure 4D

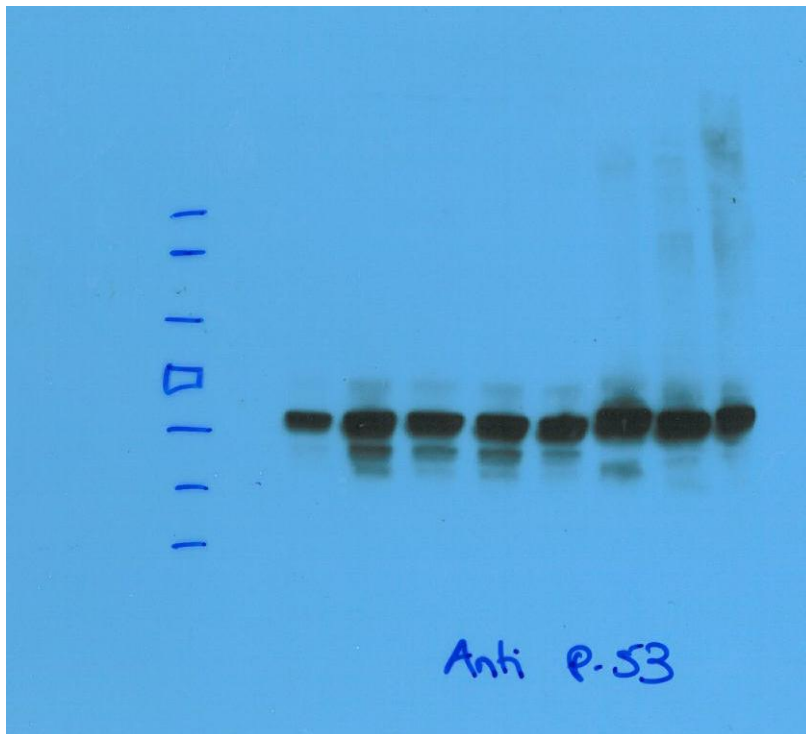

Supplement: emmm0005-1821-sd3.pdf [file emmm0005-1821-sd3.pdf]
